# Supplementary material for: Combined haploinsufficiency and purifying selection drive retention of RPL36a paralogs in Arabidopsis
Source: PubMed Central journal article supplement — Sci Rep. 2014 Feb 18;4:4122. doi: 10.1038/srep04122 (PMC3927210; doi:10.1038/srep04122), 2014-02-18
Supplement: srep04122-s1.pdf [file srep04122-s1.pdf]

**Combined haploinsufficiency and purifying  
selection drive retention of *RPL36a* paralogs in  
*Arabidopsis***

Rubén Casanova-Sáez, Héctor Candela and José Luis Micol

**Supplementary Information**

Ler

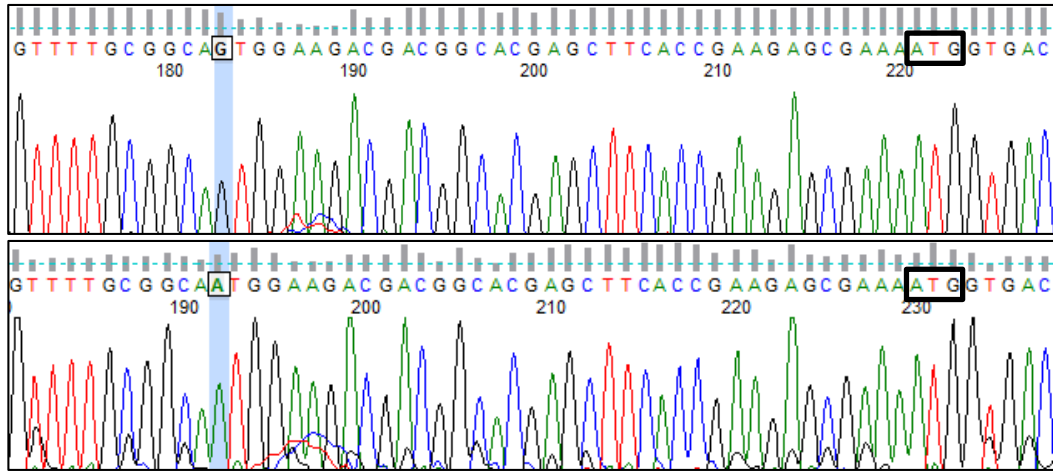

*api2*

**Supplementary Figure S1.- The *api2* mutation creates an out-of-frame ATG codon upstream of the wild-type translation start site of *API2* transcripts.** Electropherograms showing the 5'-UTR of the *API2* gene from Ler and *api2/api2* plants. The G→A *api2* point mutation is highlighted in blue. The wild-type *API2* translation start codon is boxed in black.

|                |                                                                |
|----------------|----------------------------------------------------------------|
|                | M V N I P K T K N T Y C K N K E C K K H                        |
| <i>API2</i>    | ATGGTGAACATTCCGAAAACCTAAGAACACTTACTGCAAGAACAAGGAGTGCAAGAAAGCAT |
| <i>RPL36aA</i> | ATGGTGAACATTCCAAAGACAAAGAACACTTACTGTAAGAACAAGGAATGCAAAAAGCAT   |
|                | M V N I P K T K N T Y C K N K E C K K H                        |
|                | T L H K V T Q Y K K G K D S L A A Q G K                        |
| <i>API2</i>    | ACCTTGACACAAGGTGACGACGTATAAGAAAGGTAAAGATAGCCTTGCTGCCCAAGGAAAG  |
| <i>RPL36aA</i> | ACTTTGCACAAGGTTACCCAATACAAGAAGGGTAAAGACAGTCTTGCTGCTCAAGGAAAG   |
|                | T L H K V T Q Y K K G K D S L A A Q G K                        |
|                | R R Y D R K Q S G Y G G Q T K P V F H K                        |
| <i>API2</i>    | CGTCGTTATGATCGTAAACAATCTGGTTATGGAGGTCAGACCAAGCCCGTCTTCCACAAG   |
| <i>RPL36aA</i> | CGTCGTTATGACCGTAAACAATCTGGTTATGGTGGTCAGACTAAGCCTGTCTTCCACAAA   |
|                | R R Y D R K Q S G Y G G Q T K P V F H K                        |
|                | K A K T T K K I V L R L Q C Q S C K H F                        |
| <i>API2</i>    | AAGGCTAAGACAACCTAAGAAGATTGTCTGAGGCTTCAATGCCAAAGCTGCAAGCATTTT   |
| <i>RPL36aA</i> | AAGGCTAAGACCACGAAGAAGATTGTTTGAGGCTTCAATGTTCAAAGCTGCAAGCACTTT   |
|                | K A K T T K K I V L R L Q C Q S C K H F                        |
|                | S Q R P I K R C K H F E I G G D K K G K                        |
| <i>API2</i>    | TCGCAACGCCCGATTAAAGAGGTGCAAGCACTTTGAGATCGGTGGAGACAAGAAGGGAAAG  |
| <i>RPL36aA</i> | TCGCAACGTCCTATCAAGAGGTGCAAGCACTTTGAGATCGGTGGTGAACAAGAAGGGAAAG  |
|                | S Q R P I K R C K H F E I G G D K K G K                        |
|                | G T S L F *                                                    |
| <i>API2</i>    | GGAACATCTCTCTTTTAA                                             |
| <i>RPL36aA</i> | GGAACATCTCTCTTTTAA                                             |
|                | G T S L F *                                                    |

**Supplementary Figure S2.- Synonymous substitutions along the *API2* and *RPL36aA* coding sequences.** Alignment of the *API2* and *RPL36aA* coding sequences with indication of the amino acids encoded by each codon. An asterisk indicates the stop codon. The alignment was obtained with the PAL2NAL program. Synonymous substitutions affecting the first or third base of a codon are highlighted in pink and green, respectively.

**Supplementary Table S1.- Primer sets used in this work**

| Purpose                                                 | Oligonucleotide names | Oligonucleotide sequences (5'→3')                      |                                                        |
|---------------------------------------------------------|-----------------------|--------------------------------------------------------|--------------------------------------------------------|
|                                                         |                       | Forward primer (F)                                     | Reverse primer (R)                                     |
| Linkage analysis                                        | cer466314_F/R         | CCGATTCTATTCCTCTAGGCT                                  | GTAAAAAATCTGGACTTATCAAG                                |
|                                                         | cer459267_F/R         | AGCAGCTGCCCTTTCAACAG                                   | AGGTTACTGATGCCCGAGAG                                   |
|                                                         | cer453616_F/R         | GAGCATTGGCATGTTCAATTGTT                                | TTTGAGAGTTTTCGTGTGGCCT                                 |
| API2 sequencing                                         | API2_F1/R1            | CTGATTTGCAGCACAAAACG                                   | CCACGGGCCACTGATTATTA                                   |
|                                                         | API2_R2               | TGATTTAGGAGAAGCAGGAAAT                                 |                                                        |
| Topo/Gateway cloning                                    | API2cds_F/R           | CACCATGGTGAACATTCCGAAAACATA                            | AAAGAGAGATGTTCCCTTTCC                                  |
|                                                         | RPL36aAcds_F/R        | CACCATGGTGAACATTCCAAGACAAA                             | AAACAGAGATGTTCCCTTTCCC                                 |
|                                                         | API2pro_F/R           | GGGGACCACTTTGTACAAGAAAGCTGGGT<br>TTTCGCTCTTCGGTGAAGCTC | GGGGACAAGTTTGTACAAAAAAGCAGGCT<br>TTGAGATTCAGAGAGCGTTAG |
|                                                         | RPL36aApro_F/R        | GGGGACAAGTTTGTACAAAAAAGCAGGCT<br>GATGAGGAACAAAGAAAGAGA | GGGGACCACTTTGTACAAGAAAGCTGGGT<br>TTTCGCGTCTCTGATCTCCG  |
|                                                         | M13_F/R               | GTAAAACGACGGCCAG                                       | CAGGAAACAGCTATGACCATGATT                               |
| qRT-PCR                                                 | 18SrRNA_RTqPCR_F/R    | AGGATCCATTGGAGGGCAAGT                                  | CGACGTTTTTAACTGCAACAAC                                 |
|                                                         | API2_RTqPCR_F/R       | CCACAAGAAGGCTAAGACAAC                                  | AAAGTGCTTGCACCTCTTAATC                                 |
|                                                         | RPL36aA_RTqPCR_F/R    | GACCACGAAGAAGATTGTTT                                   | GAAATGCTTGCACCTCTTGATA                                 |
| Genotyping of mutants, transgenic plants and constructs | LBb1.3_F <sup>a</sup> | ATTTTGCCGATTTTCGGAAC                                   |                                                        |
|                                                         | rpl36aa_F/R           | GATGTTCCCTTTCCCTTCTTG                                  | TGGTTCAAACGAAACCAAAAC                                  |
|                                                         | 35S-F <sup>b</sup>    | GACAGTGGTCCCAAAGATG                                    |                                                        |
|                                                         | GUS-R <sup>c</sup>    |                                                        | CACAAACGGTGATACGTACACT                                 |

<sup>a-c</sup>Each of these oligonucleotides was used together with: <sup>a</sup>rpl36aa\_R to genotype the *rpl36aa* mutant; <sup>b</sup>API2cds\_R and RPL36aAcds\_R to genotype transgenic plants putatively carrying the *35S<sub>pro</sub>:RPL36aB* and *35S<sub>pro</sub>:RPL36aA* transgenes; <sup>c</sup>API2pro\_R and RPL36aApro\_R to genotype transgenic plants putatively carrying the *API2<sub>pro</sub>:GUS* and *RPL36aA<sub>pro</sub>:GUS* transgenes.
